# Supplementary material for: Fruitlet Freeze Tolerance in Peach Germplasm
Source: Preprints.org preprint supplement (doi:10.20944/preprints202312.1704.v1), 2023-12-22
Supplement: Supplementary file 1 [file supplementary]

**Table S1.** Characteristics of the U.S. modern peach breeding germplasm used in this study, including fruitlet freeze tolerance and classification in freeze tolerance groups based on IP (inflection point, °C) and AUC (area under the curve, %). Fruit type – FT; origin – country (state); CR - chilling requirement in chill hours (CH); HR - heat requirement in growing degree hours (GDH); BD - bloom date (BLUP) in Julian Days (JD).

| Accession  | FT | Origin  | Released | CR   | HR    | BD   | Fruitlet Freeze |       |       |       |         |       | Grouping |     |      |     |
|------------|----|---------|----------|------|-------|------|-----------------|-------|-------|-------|---------|-------|----------|-----|------|-----|
|            |    |         |          | (CH) | (GDH) | (JD) | 2022            |       | 2023  |       | Average |       | 2022     |     | 2023 |     |
|            |    |         |          |      |       |      | IP              | AUC   | IP    | AUC   | IP      | AUC   | IP       | AUC | IP   | AUC |
| Elberta    | P  | US (GA) | 1889     | 800  | 5112  | 75   | -5.29           | 32.59 | -5.93 | 35.35 | -5.61   | 33.97 | 2        | 2   | 2    | 3   |
| Redrose    | P  | US (NJ) | 1940     | 850  | 1654  | 75   | -6.4            | 26.35 | -5.72 | 33.58 | -6.06   | 29.97 | 1        | 2   | 2    | 2   |
| Loring     | P  | US (MO) | 1946     | 800  | 3667  | 73   | -5.14           | 42.43 | -5.41 | 27.32 | -5.28   | 34.88 | 2        | 3   | 2    | 2   |
| Coronet    | P  | US (GA) | 1953     | 588  | 5934  | 69   | -6              | 38.67 | -5.82 | 39.08 | -5.91   | 38.88 | 2        | 3   | 2    | 3   |
| Redglobe   | P  | US (MD) | 1954     | 850  | 1654  | 75   | -5.96           | 24.69 | -5.43 | 17.69 | -5.70   | 21.19 | 2        | 1   | 2    | 1   |
| June Gold  | P  | US (CA) | 1959     | 650  | 4879  | 68   | -4.04           | 45.67 | -5.49 | 33.32 | -4.77   | 39.50 | 3        | 3   | 2    | 2   |
| Parade     | P  | US (CA) | 1960     | 800  | 3762  | 72   | -7.63           | 22.48 | -5.32 | 18.52 | -6.48   | 20.50 | 1        | 1   | 2    | 1   |
| Jefferson  | P  | US (VA) | 1960     | 850  | 3578  | 77   | -4.22           | 34.46 | -5.34 | 28.66 | -4.78   | 31.56 | 3        | 2   | 2    | 2   |
| Cresthaven | P  | US (MI) | 1963     | 950  | 5506  | 74   | -4.62           | 35.72 | -5.51 | 27.05 | -5.07   | 31.39 | 3        | 3   | 2    | 2   |
| Empress    | P  | US (CA) | 1964     | 650  | 5400  | 69   | -5.84           | 31.56 | -5.36 | 32.37 | -5.60   | 31.97 | 2        | 2   | 2    | 2   |
| Big Red    | P  | US (FL) | 1969     | 750  | 5193  | 72   | -5.32           | 29.86 | -5.01 | 25.36 | -5.17   | 27.61 | 2        | 2   | 2    | 2   |
| O’Henry    | P  | US (CA) | 1970     | 800  | 4876  | 74   | -5.53           | 28.03 | -5.3  | 28.86 | -5.42   | 28.45 | 2        | 2   | 2    | 2   |
| Brightstar | P  | US (CA) | 1976     | 708  | 6242  | 74   | -7.62           | 23.98 | -7.54 | 23.45 | -7.58   | 23.72 | 1        | 1   | 1    | 1   |
| Topaz      | P  | US (MO) | 1976     | 700  | -     | -    | -6.01           | 23.28 | -5.6  | 24.75 | -5.81   | 24.02 | 1        | 1   | 2    | 1   |
| Biscoe     | P  | US (NC) | 1977     | 900  | 5380  | 73   | -5.65           | 34.44 | -5.92 | 28.97 | -5.79   | 31.71 | 2        | 2   | 2    | 2   |
| Majestic   | P  | US (LA) | 1979     | 750  | 5869  | 73   | -4.66           | 37.06 | -5.47 | 35.18 | -5.07   | 36.12 | 3        | 3   | 2    | 3   |
| Sunprince  | P  | US (GA) | 1982     | 800  | 3402  | 71   | -7.77           | 21.95 | -5.95 | 21.95 | -6.86   | 21.95 | 1        | 1   | 2    | 1   |
| Silver Gem | N  | US (CA) | 1982     | -    | -     | -    | -6.55           | 20.91 | -6.75 | 22.13 | -6.65   | 21.52 | 1        | 1   | 1    | 1   |
| Ruston Red | P  | US (LA) | 1982     | 800  | -     | -    | -4.88           | 33.05 | -4.64 | 32.66 | -4.76   | 32.86 | 2        | 2   | 3    | 2   |
| Goldcrest  | P  | US (CA) | 1984     | 650  | 4598  | 66   | -5.75           | 35.75 | -4.65 | 36.63 | -5.20   | 36.19 | 2        | 3   | 3    | 3   |
| Juneprince | P  | US (GA) | 1985     | 650  | 4598  | 67   | -5.57           | 32.63 | -6.2  | 29.85 | -5.89   | 31.24 | 2        | 2   | 1    | 2   |
| Fireprince | P  | US (GA) | 1985     | 850  | 5796  | 73   | -4.13           | 34.27 | -5.75 | 28.72 | -4.94   | 31.50 | 3        | 2   | 2    | 2   |

| Accession       | FT | Origin  | Released | CR   | HR    | BD   | Fruitlet Freeze |       |       |       |         |       | Grouping |     |      |     |
|-----------------|----|---------|----------|------|-------|------|-----------------|-------|-------|-------|---------|-------|----------|-----|------|-----|
|                 |    |         |          | (CH) | (GDH) | (JD) | 2022            |       | 2023  |       | Average |       | 2022     |     | 2023 |     |
|                 |    |         |          |      |       |      | IP              | AUC   | IP    | AUC   | IP      | AUC   | IP       | AUC | IP   | AUC |
| Caroking        | P  | US (SC) | 1987     | 636  | 5824  | 71   | -4.46           | 40.11 | -4.04 | 44.16 | -4.25   | 42.14 | 3        | 3   | 3    | 3   |
| Tra-Zee         | P  | US (CA) | 1988     | 800  | 5915  | 80   | -5.29           | 28.47 | -5.39 | 29.05 | -5.34   | 28.76 | 2        | 2   | 2    | 2   |
| Carogem         | P  | US (SC) | 1989     | 850  | 2178  | 75   | -6.35           | 28.15 | -5.9  | 25.3  | -6.13   | 26.73 | 1        | 2   | 2    | 2   |
| Scarlet Pearl   | P  | US (GA) | 1989     | 750  | 5531  | 72   | -4.68           | 38.57 | -6    | 35.06 | -5.34   | 36.82 | 3        | 3   | 2    | 3   |
| Summer Fire     | N  | US (CA) | 1990     | -    | -     | -    | -8.62           | 20.93 | -6.16 | 23.62 | -7.39   | 22.28 | 1        | 1   | 1    | 1   |
| Rich May        | P  | US (CA) | 1991     | 800  | 3402  | 70   | -5.39           | 35.31 | -     | -     | -5.39   | 35.31 | 2        | 3   | -    | -   |
| Summerprince    | P  | US (GA) | 1992     | 850  | 5242  | 71   | -6.75           | 22.59 | -7.24 | 24.76 | -7.00   | 23.68 | 1        | 1   | 1    | 1   |
| Glory           | P  | US (GA) | 1992     | 800  | 5280  | 74   | -6.25           | 21.85 | -5.4  | 15.75 | -5.83   | 18.80 | 1        | 1   | 2    | 1   |
| Rich Joy        | P  | US (CA) | 1992     | 850  | -     | -    | -4.25           | 44.13 | -4.37 | 39.06 | -4.31   | 41.60 | 3        | 3   | 3    | 3   |
| Arctic Pride    | N  | US (CA) | 1993     | 800  | 2846  | 69   | -10.22          | 19.36 | -6.04 | 23.8  | -8.13   | 21.58 | 1        | 1   | 1    | 1   |
| Flameprince     | P  | US (GA) | 1993     | 850  | 5661  | 72   | -5.11           | 32.13 | -6.21 | 29.56 | -5.66   | 30.85 | 2        | 2   | 1    | 2   |
| Guardian®       | P  | US (SC) | 1993     | 850  | -     | -    | -4.99           | 25.98 | -5.79 | 25.57 | -5.39   | 25.78 | 3        | 2   | 2    | 2   |
| P.F. 23         | P  | US (MI) | 1993     | 700  | 5287  | 69   | -4.84           | 32.03 | -5.8  | 34.82 | -5.32   | 33.43 | 3        | 2   | 2    | 2   |
| Arctic Gold     | N  | CFZ     | 1995     | -    | -     | -    | -5.98           | 23.11 | -5.65 | 22.38 | -5.82   | 22.75 | 2        | 1   | 2    | 1   |
| Autumn Red      | P  | US (CA) | 1996     | 800  | 5284  | 78   | -4.48           | 31.97 | -5.42 | 33.35 | -4.95   | 32.66 | 3        | 2   | 2    | 2   |
| Sweet September | P  | US (CA) | 1997     | 850  | 2350  | 80   | -8.28           | 25.35 | -5.97 | 25.44 | -7.13   | 25.40 | 1        | 2   | 2    | 2   |
| Autumnprince    | P  | US (GA) | 1997     | 800  | 3901  | 73   | -7.26           | 26.71 | -6.29 | 26    | -6.78   | 26.36 | 1        | 2   | 1    | 2   |
| Snow Prince     | P  | US (CA) | 1997     | -    | -     | -    | -6.21           | 23.92 | -6.59 | 20.01 | -6.40   | 21.97 | 1        | 1   | 1    | 1   |
| Rubyprince      | P  | US (GA) | 1997     | 850  | -     | -    | -5.42           | 31.87 | -7.79 | 27.14 | -6.61   | 29.51 | 2        | 2   | 1    | 2   |
| Juneprincess    | N  | US (GA) | 1997     | 850  | 6117  | 73   | -4.02           | 18.7  | -4.08 | 24.49 | -4.05   | 21.60 | 3        | 1   | 3    | 1   |
| Arctic Belle    | N  | US (CA) | 1998     | 900  | 6076  | 75   | -6.9            | 21.02 | -6.98 | 23.94 | -6.94   | 22.48 | 1        | 1   | 1    | 1   |
| Arctic Blaze    | N  | US (CA) | 1998     | 750  | 4476  | 69   | -6.88           | 19.82 | -5.39 | 23.07 | -6.14   | 21.45 | 1        | 1   | 2    | 1   |
| Sureprince      | P  | US (GA) | 1998     | 950  | 5260  | 73   | -5.89           | 36.89 | -6.24 | 37.52 | -6.07   | 37.21 | 2        | 3   | 1    | 3   |
| Valley Sweet    | P  | US (CA) | 1998     | 700  | 4485  | 64   | -5.49           | 32.21 | -5.98 | 29.21 | -5.74   | 30.71 | 2        | 2   | 2    | 2   |
| Joanna Sweet    | P  | US (CA) | 1999     | 800  | 5112  | 75   | -4.96           | 31.86 | -5.63 | 34.7  | -5.30   | 33.28 | 3        | 2   | 2    | 2   |

| Accession          | FT | Origin  | Released | CR   | HR    | BD   | Fruitlet Freeze |       |       |       |         |       | Grouping |     |      |     |
|--------------------|----|---------|----------|------|-------|------|-----------------|-------|-------|-------|---------|-------|----------|-----|------|-----|
|                    |    |         |          | (CH) | (GDH) | (JD) | 2022            |       | 2023  |       | Average |       | 2022     |     | 2023 |     |
|                    |    |         |          |      |       |      | IP              | AUC   | IP    | AUC   | IP      | AUC   | IP       | AUC | IP   | AUC |
| John Boy           | P  | US (PA) | 2000     | 800  | 4365  | 74   | -5.37           | 31.84 | -6.35 | 28.24 | -5.86   | 30.04 | 2        | 2   | 1    | 2   |
| China Pearl        | P  | US (NC) | 2001     | 1100 | -     | -    | -4.65           | 36.53 | -3.94 | 35.74 | -4.30   | 36.14 | 3        | 3   | 3    | 3   |
| Arrington          | N  | US (AR) | 2002     | 750  | 5193  | 72   | -6.5            | 22.53 | -4.97 | 32.69 | -5.74   | 27.61 | 1        | 1   | 3    | 2   |
| Westbrook          | N  | US (AR) | 2002     | 750  | 4791  | 73   | -6.26           | 23.54 | -7.32 | 23.23 | -6.79   | 23.39 | 1        | 1   | 1    | 1   |
| White River        | P  | US (AR) | 2002     | 700  | -     | -    | -5.27           | 34.31 | -5.7  | 29.89 | -5.49   | 32.10 | 2        | 2   | 2    | 2   |
| Julyprince         | P  | US (GA) | 2004     | 850  | 1654  | 75   | -4.05           | 47.76 | -4.91 | 40.38 | -4.48   | 44.07 | 3        | 3   | 3    | 3   |
| Carored            | P  | US (SC) | 2005     | 612  | 6197  | 69   | -5.49           | 35.52 | -     | -     | -5.49   | 35.52 | 2        | 3   | -    | -   |
| Augustprince       | P  | US (GA) | 2006     | 850  | 1547  | 75   | -6.25           | 25.16 | -5.38 | 32.18 | -5.82   | 28.67 | 1        | 2   | 2    | 2   |
| Early Augustprince | P  | US (GA) | 2006     | 800  | 5112  | 74   | -5.95           | 23.42 | -6.61 | 16.14 | -6.28   | 19.78 | 2        | 1   | 1    | 1   |
| Messina®           | P  | US (NJ) | 2006     | -    | -     | -    | -5.95           | 33.57 | -     | -     | -5.95   | 33.57 | 2        | 2   | -    | -   |
| FlavrBurst™        | P  | US (WV) | 2008     | -    | -     | -    | -4.9            | 33.31 | -     | -     | -4.90   | 33.31 | 3        | 2   | -    | -   |
| SummerFest™        | P  | US (WV) | 2010     | -    | -     | -    | -5.6            | 23.27 | -6.21 | 23.93 | -5.91   | 23.60 | 2        | 1   | 1    | 1   |
| Sweetstar          | P  | France  | 2010     | -    | -     | -    | -4.75           | 30.75 | -7.06 | 26.27 | -5.91   | 28.51 | 3        | 2   | 1    | 2   |
| SC-01              | P  | US (SC) | -        | 800  | 2706  | 66   | -4.75           | 37.28 | -5.05 | 37.95 | -4.90   | 37.62 | 3        | 3   | 2    | 3   |
| SC-02              | P  | US (SC) | -        | 564  | 5947  | 62   | -5.62           | 32.7  | -5.32 | 30.02 | -5.47   | 31.36 | 2        | 2   | 2    | 2   |
| SC-03              | P  | US (SC) | -        | 972  | 3877  | 77   | -5.36           | 28.96 | -5.34 | 27.77 | -5.35   | 28.37 | 2        | 2   | 2    | 2   |
| SC-04              | P  | US (SC) | -        | 996  | 3052  | 76   | -4.58           | 31.16 | -5.6  | 33.68 | -5.09   | 32.42 | 3        | 2   | 2    | 2   |
| SC-05              | P  | US (SC) | -        | 1068 | 4147  | 78   | -5.18           | 32.46 | -4.74 | 34.69 | -4.96   | 33.58 | 2        | 2   | 3    | 2   |
| SC-06              | P  | US (SC) | -        | 1116 | 4856  | 72   | -6              | 34.87 | -5.27 | 27.35 | -5.64   | 31.11 | 2        | 2   | 2    | 2   |
| SC-07              | P  | US (SC) | -        | 972  | 1362  | 70   | -5.58           | 23.27 | -7.24 | 24.48 | -6.41   | 23.88 | 2        | 1   | 1    | 1   |
| SC-08              | P  | US (SC) | -        | 800  | 5095  | 69   | -5.43           | 24.31 | -6.85 | 27.66 | -6.14   | 25.99 | 2        | 1   | 1    | 2   |
| SC-09              | P  | US (SC) | -        | 708  | 5473  | 71   | -4.93           | 35.46 | -5.72 | 35.57 | -5.33   | 35.52 | 3        | 3   | 2    | 3   |
| SC-10              | P  | US (SC) | -        | 516  | 5997  | 62   | -5.72           | 26.79 | -5.97 | 26.32 | -5.85   | 26.56 | 2        | 2   | 2    | 2   |
| SC-11              | P  | US (SC) | -        | 1068 | 3779  | 73   | -5.85           | 30.04 | -5.64 | 31.74 | -5.75   | 30.89 | 2        | 2   | 2    | 2   |
| SC-12              | P  | US (SC) | -        | 540  | 7039  | 67   | -6.43           | 27.13 | -6.05 | 25.89 | -6.24   | 26.51 | 1        | 2   | 1    | 2   |

| Accession | FT | Origin  | Released | CR   | HR    | BD   | Fruitlet Freeze |       |       |       |         |       | Grouping |     |      |     |
|-----------|----|---------|----------|------|-------|------|-----------------|-------|-------|-------|---------|-------|----------|-----|------|-----|
|           |    |         |          | (CH) | (GDH) | (JD) | 2022            |       | 2023  |       | Average |       | 2022     |     | 2023 |     |
|           |    |         |          |      |       |      | IP              | AUC   | IP    | AUC   | IP      | AUC   | IP       | AUC | IP   | AUC |
| SC-13     | P  | US (SC) | -        | 516  | 6863  | 65   | -5.7            | 28.32 | -6.58 | 28.21 | -6.14   | 28.27 | 2        | 2   | 1    | 2   |
| SC-14     | P  | US (SC) | -        | -    | -     | -    | -5.44           | 30.24 | -5.29 | 29.8  | -5.37   | 30.02 | 2        | 2   | 2    | 2   |
| SC-15     | P  | US (SC) | -        | -    | -     | -    | -5.27           | 31.5  | -5.78 | 28.17 | -5.53   | 29.84 | 2        | 2   | 2    | 2   |

Accessions are ordered based on the year of release. Peach – P and nectarine – N. FlavrBurst™ (KV00398); Messina® (NJ352); SummerFest™ (KV981175).

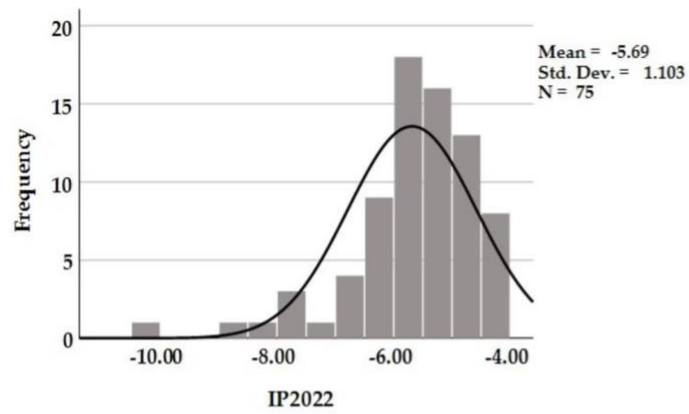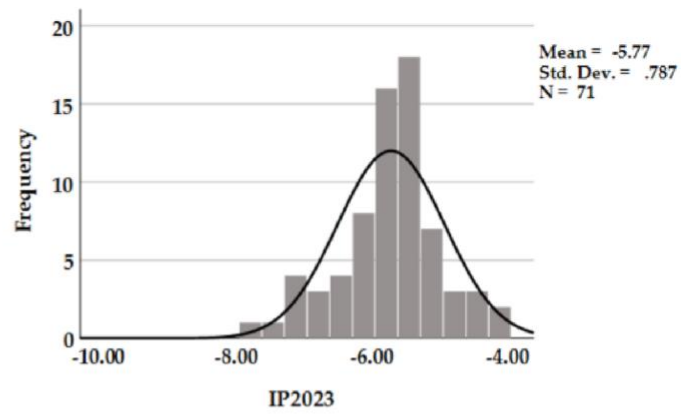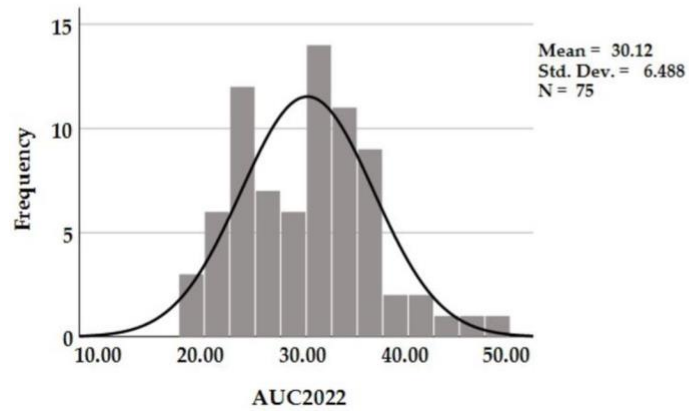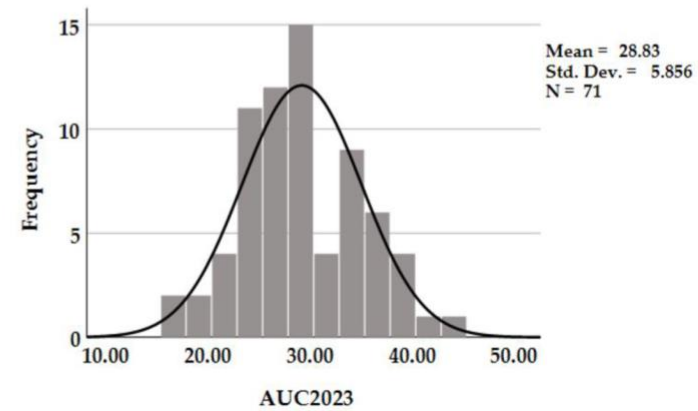

Figure S1. Frequency distribution of Inflection Point (IP) and area under the curve (AUC) of fruitlet freeze tolerance within the peach and nectarine germplasm in 2022 and 2023 season.

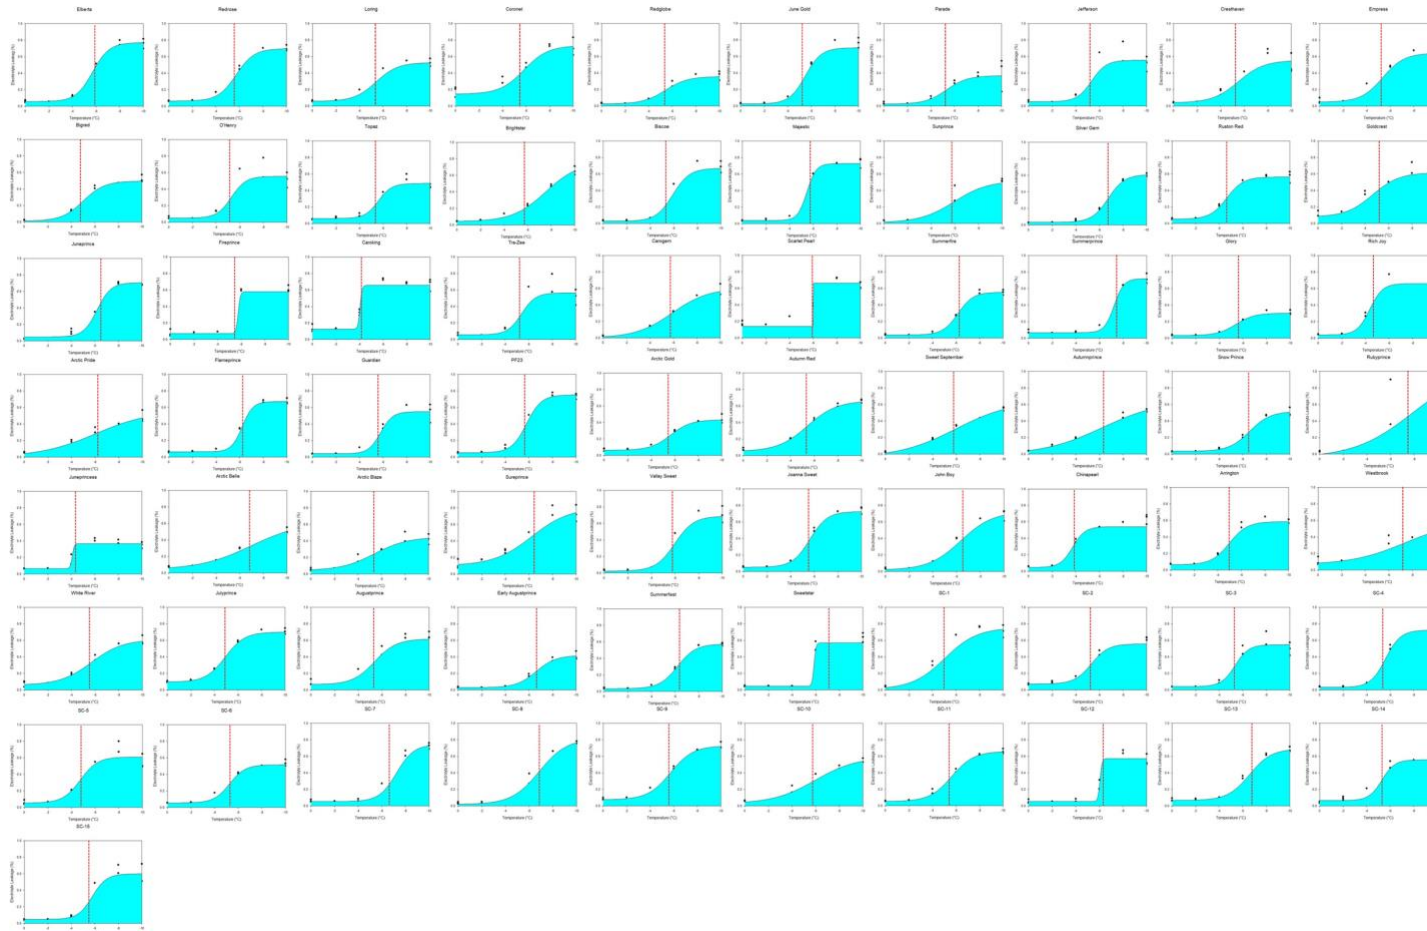

Figure S2. Fruitlet response to freezing temperatures observed in peach and nectarine germplasm in 2022. Accessions are listed by release year; red line designates inflection point, the temperature at which 50% of fruitlets experience damage; blue area – area under the sigmoid curve represents % damage.

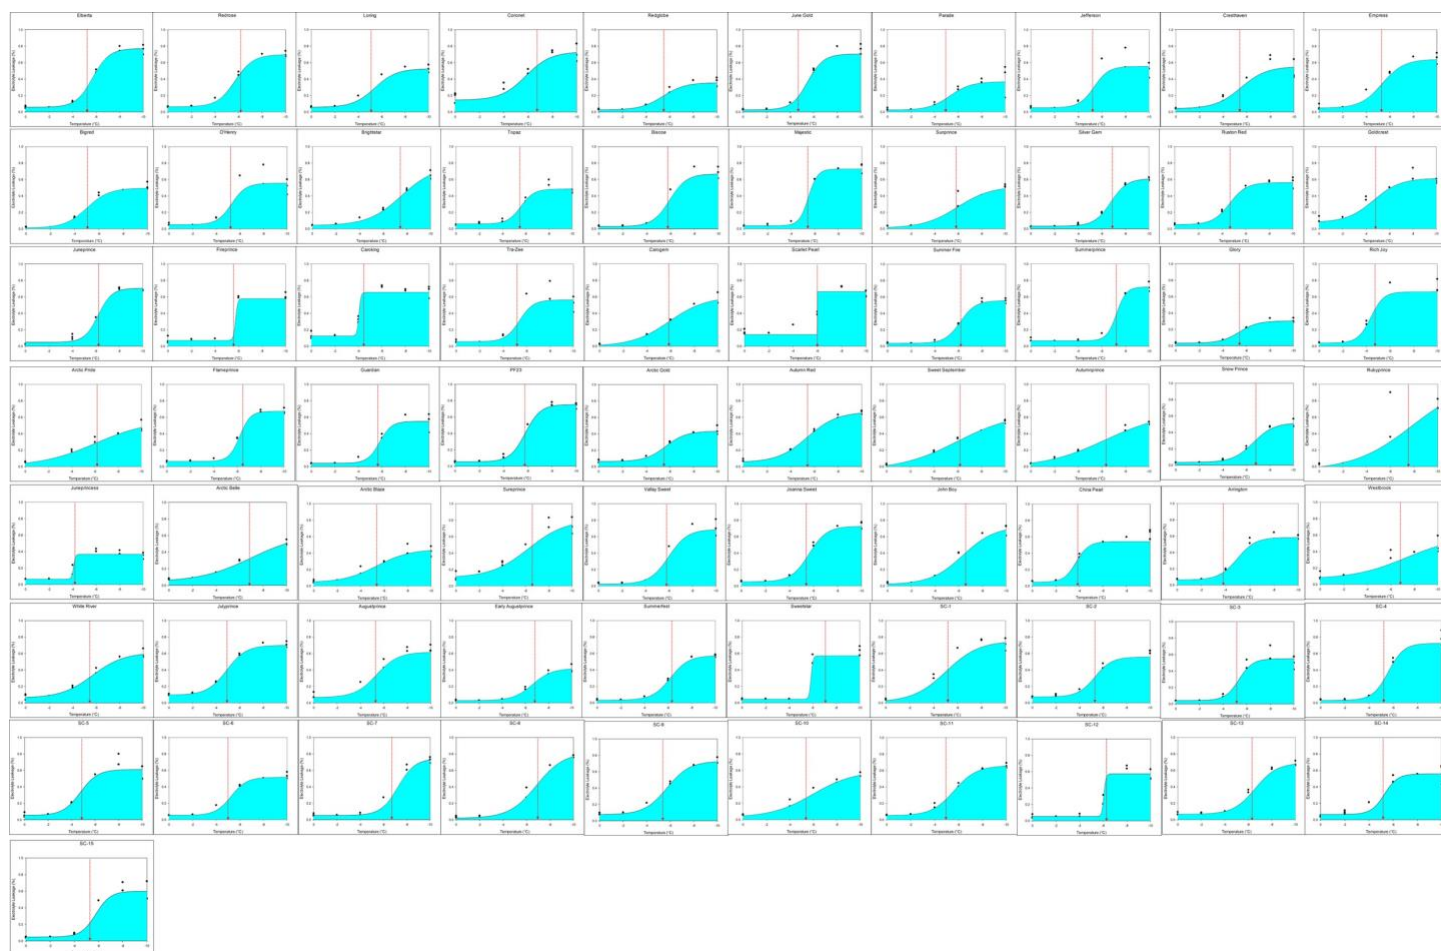

Figure S3. Fruitlet response to freezing temperatures observed in peach and nectarine germplasm in 2023. Accessions are listed by release year; red line designates inflection point, the temperature at which 50% of fruitlets experience damage; blue area – area under the sigmoid curve represents % damage.
